# Supplementary material for: Innate and learnt color preferences in the common green-eyed white butterfly (Leptophobia aripa): experimental evidence
Source: PeerJ. 2021 Nov 29;9:e12567. doi: 10.7717/peerj.12567 (PMC8638565; doi:10.7717/peerj.12567)
Supplement: Supplemental Information 1 — First visits, number of visits and duration of visits by naive butterflies faced to artificial floral arrays of different colors. [file peerj-09-12567-s001.xlsx]

## Sheet: Hoja1
Date	Start time	Individual	Time until a flower visit (min)	Duration of a visit (min)	flower color
2019-09-27	11:45:00	1	09:06:00	21	red
	11:45:00	2	05:50:00	25	red
	12:32:00	3	X	X	X
	12:33:00	4	01:03:00	0.1	pink
	13:05:00	5	X	X	X
	13:05:00	6	01:07:00	22	red
	13:40:00	7	01:00:00	2	white
			02:08:00	28	red
	13:40:00	8	01:50:00	2	yellow
2019-09-30	09:00:00	9	05:19:00	2	red
			07:14:00	1	red
			15:21:00	1	pink
	09:35:00	10	12:15:00	10	red
			1900-01-01 03:24:00	1	yellow
	10:10:00	11	20:00:00	5	red
	10:45:00	12	03:20:00	7	red
	12:52:00	13	X	X	X
	12:52:00	14	11:23:00	4	red
	13:30:00	15	01:00:00	10	red
			14:00:00	0.6	white
			1 day, 4:04:00	2	pink
	13:30:00	16	02:00:00	3	yellow
			05:00:00	1	red
	14:07:00	17	05:02:00	0.4	pink
			10:00:00	0.2	yellow
			22:42:00	2	pink
			1900-01-01 04:01:00	2	red
	14:07:00	18	08:00:00	4	red
2019-10-01	10:50:00	19	18:00:00	12	red
	10:50:00	20	01:20:00	0.1	pink
			04:20:00	5	red
			18:00:00	12	red
2019-10-09	09:30:00	21	04:21:00	2.17	red
			07:34:00	15.32	red
			1900-01-01 03:15:00	1.33	yellow
	10:00:00	22	03:21:00	15.22	red
			20:48:00	4.26	pink
			1900-01-01 05:11:00	0.1	pink
	10:30:00	23	05:42:00	6.27	Rojo
			19:11:00	3.5	Rojo
	11:00:00	24	03:29:00	7.16	Amarillo
			20:13:00	2.44	Rojo
			1900-01-01 04:26:00	1.23	Rojo
	11:30:00	25	10:30:00	3.42	Rojo
			15:17:00	1.14	yellow
			20:26:00	0.34	white
	12:00:00	26	07:14:00	1.32	red
	12:35:00	27	17:42:00	3.37	red
			1900-01-01 01:11:00	4.17	white
	12:35:00	28	02:13:00	0.42	yellow
	13:13:00	29	1900-01-01 02:34:00	3	red
	13:13:00	30	05:02:00	15.19	yellow
			18:07:00	3	red
	13:50:00	31	15:52:00	6.43	red
	13:50:00	32	07:52:00	9.19	pink
			20:51:00	9.09	pink
