# Supplementary material for: Innate and learnt color preferences in the common green-eyed white butterfly (Leptophobia aripa): experimental evidence
Source: PeerJ. 2021 Nov 29;9:e12567. doi: 10.7717/peerj.12567 (PMC8638565; doi:10.7717/peerj.12567)
Supplement: Supplemental Information 2 — Data showing the time until a butterfly arrived to a flower (yellow, blue or white). The frequency of visits (number of visits) and the duration of visits were obtained from these censored data. [file peerj-09-12567-s002.xlsx]

## Sheet: Yellow-Blue
Date	Start time	Time until a butterfly visit (min)	Duration of a visit (min)	Flower color
2020-03-13	11:45 hrs	00:19:48	0.3	yellow
		00:52:00	0.2	yellow
		01:10:00	0.7	yellow
		01:39:00	0.1	yellow
		04:05:00	0.3	yellow
		04:11:00	0.2	yellow
		04:28:00	0.11	yellow
		05:23:00	0.2	yellow
		08:54:00	0.2	yellow
		09:45:00	5.17	yellow
		10:29:00	0.2	yellow
		10:54:00	0.1	yellow
		20:47:00	0.2	yellow
		22:15:00	0.4	yellow
2020-03-13	12:20 hrs	1900-01-01 00:17:00	0.2	yellow
		1900-01-01 00:45:00	0.1	yellow
		1900-01-01 01:57:00	0.3	yellow
		1900-01-01 03:24:00	0.1	yellow
		1900-01-01 05:40:00	0.2	yellow
		05:30:00	0.43	blue
		08:05:00	0.23	blue
		12:42:00	0.21	blue
		16:03:00	0.2	blue
		20:50:00	0.1	blue
		22:15:00	0.2	blue
2020-03-17	12:18 hrs	1900-01-01 00:18:00	0.1	blue
		1900-01-01 00:24:00	0.1	blue
		1900-01-01 01:09:00	0.1	blue
		1900-01-01 05:47:00	0.1	blue
		04:15:00	0.25	yellow
		06:36:00	0.1	yellow
		06:50:00	0.4	yellow
		10:29:00	0.5	yellow
		15:17:00	0.2	yellow
		15:26:00	0.1	yellow
		16:21:00	0.3	yellow
		16:26:00	0.7	yellow
		16:37:00	0.2	yellow
		17:00:00	0.22	yellow
		20:29:00	0.7	yellow
2020-03-17	12:40 hrs	1900-01-01 00:10:00	0.41	yellow
		1900-01-01 00:15:00	0.3	yellow
		1900-01-01 01:01:00	0.36	yellow
		1900-01-01 01:12:00	0.1	yellow
		1900-01-01 01:36:00	0.2	yellow
		1900-01-01 02:22:00	0.5	yellow
		1900-01-01 02:44:00	0.3	yellow
		1900-01-01 03:12:00	0.41	yellow
		1900-01-01 03:52:00	0.4	yellow
		1900-01-01 04:15:00	0.15	yellow
		1900-01-01 05:45:00	0.3	yellow
		1900-01-01 05:48:00	0.1	yellow
		10:39:00	0.1	blue
		11:12:00	0.1	blue
		12:29:00	0.1	blue
		12:44:00	0.1	blue
		13:07:00	0.2	blue
		17:48:00	0.1	blue
		20:05:00	0.1	blue
		23:34:00	6	blue
2020-03-17	12:52 hrs	1900-01-01 00:51:00	0.1	blue
		1900-01-01 06:00:00	0.1	blue
		05:39:00	0.1	yellow
		08:24:00	0.6	yellow
		08:52:00	0.5	yellow
		08:57:00	0.3	yellow
		09:30:00	0.2	yellow
		09:51:00	0.1	yellow
		10:50:00	0.12	yellow
		12:41:00	0.1	yellow
		14:34:00	0.1	yellow
		18:53:00	0.2	yellow
		17:12:00	0.11	yellow
		19:00:00	0.26	yellow
		19:39:00	0.8	yellow
		22:44:00	0.2	yellow
2020-03-18	11:38 hrs	1900-01-01 03:32:00	0.1	yellow
		1900-01-01 03:38:00	0.4	yellow
2020-03-18	12:17 hrs	01:37:00	0.1	blue
		01:48:00	0.1	blue
		09:12:00	0.1	blue
		20:18:00	0.1	blue
2020-03-19	11:48 hrs	1900-01-01 03:48:00	0.1	blue
		05:43:00	0.2	yellow
		07:33:00	0.2	yellow
		08:41:00	0.2	yellow
		09:20:00	0.2	yellow
		10:27:00	0.2	yellow
		10:39:00	0.48	yellow
		13:44:00	0.19	yellow
		15:05:00	0.35	yellow
		15:41:00	0.13	yellow
		15:54:00	0.1	yellow
		16:01:00	0.1	yellow
2020-03-19	12:23 hrs	1900-01-01 02:39:00	0.2	yellow
		1900-01-01 03:02:00	0.28	yellow
		1900-01-01 03:05:00	0.35	yellow
		1900-01-01 03:40:00	0.4	yellow
		1900-01-01 05:04:00	0.9	yellow
		1900-01-01 05:11:00	0.4	yellow
		1900-01-01 05:41:00	0.12	yellow
		07:40:48	0.1	blue
2020-03-19	12:33 hrs	04:05:00	0.1	blue
		04:21:00	0.1	blue
		07:57:00	0.1	blue
		09:05:00	0.5	blue
		12:02:00	0.41	blue
		12:09:00	0.4	blue
		12:45:00	0.2	blue
		14:44:00	0.34	blue
		16:01:00	0.1	blue
		22:11:00	0.1	blue
		22:20:00	0.1	blue
2020-03-20	11:57 hrs	1900-01-01 03:33:00	0.1	blue
		1900-01-01 04:35:00	0.1	blue
		10:01:00	0.7	yellow
		11:45:00	0.57	yellow
		12:42:00	0.3	yellow
		12:45:00	0.1	yellow
		13:10:00	0.2	yellow
		13:17:00	0.2	yellow
		13:27:00	0.2	yellow
		13:57:00	0.18	yellow
		14:20:00	0.2	yellow
		14:34:00	0.9	yellow
		15:01:00	0.1	yellow
		16:45:00	0.2	yellow
		18:30:00	0.1	yellow
2020-03-20	12:30 hrs	1900-01-01 00:24:00	0.1	yellow
		1900-01-01 01:09:00	0.4	yellow
		1900-01-01 01:45:00	0.15	yellow
		1900-01-01 02:54:00	0.1	yellow
		1900-01-01 03:16:00	0.3	yellow
		1900-01-01 04:08:00	0.2	yellow
		1900-01-01 04:25:00	0.1	yellow
		1900-01-01 05:47:00	0.1	yellow
		1900-01-01 05:54:00	0.6	yellow
		06:34:00	0.2	blue
		09:55:00	0.3	blue
		10:33:00	0.1	blue
		10:43:00	0.57	blue
		14:37:00	0.2	blue
		14:54:00	0.17	blue
		16:31:00	0.1	blue
		20:47:00	0.1	blue
		21:00:00	0.1	blue
		21:33:00	0.1	blue
2020-03-20	13:10 hrs	1900-01-01 01:14:00	0.1	blue

## Sheet: Yellow-White
Date	Start time	Time until a butterfly visit (min)	Duration of a visit (min)	Flower color
2020-03-24	11:44:00	00:17:00	0.11	yellow
		01:22:00	0.1	yellow
		01:23:00	0.1	yellow
		01:39:00	0.1	yellow
		02:33:00	0.2	yellow
		05:19:00	0.3	yellow
		05:54:00	5.44	yellow
		13:24:00	0.1	yellow
		13:25:00	0.1	yellow
		13:51:00	0.1	yellow
		15:35:00	0.1	yellow
		18:10:00	0.1	yellow
		20:09:00	0.2	yellow
		21:22:00	0.11	yellow
		21:53:00	7.33	yellow
		22:19:00	0.1	yellow
		23:20:00	0.2	yellow
2020-03-24	12:19:00	1900-01-01 03:41:00	0.1	yellow
		1900-01-01 04:06:00	0.4	yellow
		1900-01-01 05:12:00	0.9	yellow
		16:14:00	0.1	white
		19:08:00	0.1	white
2020-03-25	12:00:00	02:52:48	0.1	yellow
		02:53:00	0.1	yellow
		02:54:00	0.1	yellow
		03:25:00	0.12	yellow
		03:37:00	0.54	yellow
		04:17:00	0.3	yellow
		04:23:00	0.4	yellow
		04:27:00	0.6	yellow
		04:33:00	0.4	yellow
		04:37:00	0.4	yellow
		04:42:00	0.57	yellow
		04:49:00	0.4	yellow
		04:53:00	1.04	yellow
		05:46:00	0.54	yellow
		07:33:00	0.2	yellow
		12:40:00	0.1	white
2020-03-25	12:34:00	1900-01-01 01:18:00	0.1	white
		1900-01-01 02:08:00	0.1	white
		1900-01-01 06:00:00	0.1	white
		12:43:12	0.42	yellow
2020-03-26	11:31:00	01:34:00	3.53	yellow
		01:41:00	2	yellow
		01:53:00	1.3	yellow
		03:57:00	0.3	yellow
		04:16:00	0.1	yellow
		04:25:00	26.25	yellow
		04:27:00	0.1	yellow
		04:43:00	0.15	yellow
		05:00:00	0.3	yellow
		05:14:00	0.2	yellow
		21:30:00	0.3	yellow
		22:00:00	0.1	yellow
		22:13:00	0.1	yellow
		22:48:00	0.1	yellow
		23:44:00	0.3	yellow
2020-03-26	12:03:00	1900-01-01 01:54:00	0.2	yellow
		1900-01-01 02:16:00	0.1	yellow
		1900-01-01 03:13:00	0.5	yellow
		1900-01-01 03:54:00	0.1	yellow
		1900-01-01 04:42:00	0.4	yellow
		1900-01-01 04:46:00	0.31	yellow
		1900-01-01 05:30:00	0.2	yellow
		13:46:00	0.1	white
2020-03-27	11:37:00	1900-01-01 01:22:00	0.1	white
		1900-01-01 03:20:00	0.1	white
		07:12:00	1.05	yellow
2020-03-27	11:51:00	12:00:00	10.01	yellow
		02:19:00	0.2	yellow
		02:22:00	0.52	yellow
		03:10:00	0.14	yellow
		03:24:00	0.14	yellow
		16:19:00	0.7	yellow
		19:57:00	0.2	yellow
		22:26:00	0.2	yellow
2020-03-27	12:11:00	1900-01-01 00:10:00	3.41	yellow
		1900-01-01 00:54:00	0.5	yellow
		1900-01-01 01:24:00	0.2	yellow
		1900-01-01 02:37:00	0.33	yellow
		1900-01-01 04:24:00	0.24	yellow
		1900-01-01 05:04:00	0.1	yellow
